# Supplementary material for: Deciphering the Role of Protein Kinase D1 (PKD1) in Cellular Proliferation
Source: Oxford University Press journal article supplement (doi:10.1158/1541-7786.mcr-19-0125), 2019-07-16
Supplement: 15417786mcr190125-sup-216606_2_supp_5641555_pshjfz.docx [file 15417786mcr190125-sup-216606_2_supp_5641555_pshjfz.docx]

**Supplemental Figure Legends**

**Additional file 1: Figure S1**. mRNA level of PKD1 expression from breast cancer TCGA data.

**Additional file 2: Figure S2**. mRNA level of PKD1 expression from colorectal cancer (top) and kidney renal clear cell cancer (bottom) TCGA data.

**Additional file 3: Figure S3**. mRNA level of PKD1 expression from head and neck squamous cell cancer (top) and kidney renal papillary cell cancer (bottom) TCGA data.

**Additional file 4: Figure S4**. mRNA level of PKD1 expression from lung adenocarcinoma (top) and lung squamous cell cancer (bottom) TCGA data.

**Additional file 5: Figure S5**. mRNA level of PKD1 expression from pancreatic cancer TCGA data.

**Additional file 6: Figure S6**. mRNA level of PKD1 expression from prostate cancer TCGA data.

**Additional file 7: Figure S7**. mRNA level of PKD1 expression from melanoma TCGA data.

**Additional file 8: Figure S8**. mRNA level of PKD1 expression from stomach cancer TCGA data.
